1 **Xenotransplantation of Human PSC-derived Microglia Creates a Chimeric Mouse Brain Model**  
2 **that Recapitulates Features of Adult Human Microglia**

3  
4 Ranjie Xu<sup>1</sup>, Andrew Boreland<sup>1</sup>, Anthony Posyton<sup>1</sup>, Kelvin Kwan<sup>1</sup>, Ronald P. Hart<sup>1</sup>, Peng Jiang<sup>1,\*</sup>

5  
6 <sup>1</sup>Department of Cell Biology and Neuroscience, Rutgers University, Piscataway, NJ 08854, USA.  
7  
8  
9

10  
11  
12  
13  
14  
15  
16  
17 \*Address correspondence to:

18 Peng Jiang, Ph.D.

19 Assistant Professor

20 Department of Cell Biology and Neuroscience

21 Rutgers University

22 604 Allison Road, Piscataway, NJ 08854

23 Email: peng.jiang@rutgers.edu

24 Phone: 848-445-2805

1 **Abstract**

2  
3 Microglia, the brain-resident macrophages, exhibit highly dynamic functions in neurodevelopment and  
4 neurodegeneration. Human microglia possess unique features as compared to mouse microglia, but  
5 our understanding of human microglial functions is largely limited by an inability to obtain human  
6 microglia under resting, homeostatic states. We developed a human pluripotent stem cell (hPSC)-  
7 based microglial chimeric mouse brain model by transplanting hPSC-derived primitive macrophage  
8 precursors into neonatal mouse brains. The engrafted human microglia widely disperse in the brain and  
9 replace mouse microglia in corpus callosum at 6 months post-transplantation. Single-cell RNA-  
10 sequencing of the hPSC microglial chimeric mouse brains reveals that xenografted hPSC-derived  
11 microglia largely retain human microglial identity, as they exhibit signature gene expression patterns  
12 consistent with physiological human microglia and recapitulate heterogeneity of adult human microglia.  
13 Importantly, the chimeric mouse brain also models species-specific transcriptomic differences in the  
14 expression of neurological disease-risk genes in microglia. This model will serve as a novel tool to  
15 study the role of human microglia in brain development and degeneration.

## 1 Introduction

2  
3 As the resident macrophages of the central nervous system (CNS), microglia play critical roles in  
4 maintenance of CNS homeostasis and regulation of a broad range of neuronal responses<sup>1,2</sup>. Recent  
5 studies indicate that dysfunction of microglia contributes to neurodevelopmental and neurodegenerative  
6 diseases, including Alzheimer's disease (AD)<sup>3-7</sup>. Moreover, genome-wide association studies have  
7 shown that many neurological disease risk genes, particularly many AD risk genes, are highly and  
8 sometimes exclusively expressed by microglia<sup>8-10</sup>. These observations provide a compelling incentive  
9 to investigate the role of microglia in models of abnormal brain development and neurodegeneration.  
10 Most studies of microglia largely rely on rodent microglia. However, there is increasing evidence that  
11 rodent microglia are not able to faithfully mirror the biology of human microglia<sup>11</sup>. In particular, recent  
12 transcriptomic studies have clearly demonstrated that a number of immune genes, not identified as part  
13 of the mouse microglial signature, were abundantly expressed in human microglia<sup>8,12</sup>. Moreover, a  
14 limited overlap was observed in microglial genes regulated during aging and neurodegeneration  
15 between mice and humans, indicating that human and mouse microglia age differently under normal  
16 and diseased conditions<sup>12,13</sup>. These findings argue for the development of species-specific research  
17 tools to investigate microglial functions in human brain development, aging, and neurodegeneration.

18 Functional human brain tissue is scarcely available. In addition, given the considerable  
19 sensitivity of microglia to environmental changes<sup>8</sup>, the properties of available human microglia isolated  
20 from surgically resected brain tissue may vary significantly, due to different disease states of the  
21 patients and the multi-step procedures used for microglia purification. In order to study human microglia  
22 in a relatively homeostatic state, many scientists have turned to human pluripotent stem cells (hPSCs).  
23 Recent advances in stem cell technology have led to the efficient generation of microglia from hPSCs  
24<sup>14-19</sup>, providing an unlimited source of human microglia to study their function. However, when cultured  
25 alone or co-cultured with neurons and astrocytes in 2-dimensional (2D) or 3D organoid/spheroid culture  
26 systems, these hPSC-derived microglia best resemble fetal or early postnatal human microglia, as  
27 indicated by much lower expression of key microglial molecules such as TREM2, TMEM119, and  
28 P2RY12 in the hPSC-derived microglia, as compared to microglia derived from adult human brain  
29 tissue<sup>16,18,20</sup>. Thus, even with these novel *in vitro* models, it has been challenging to advance  
30 understanding of human microglial function in adult ages or in neurodegeneration during aging.

31 Recent studies from us<sup>21,22</sup> and others<sup>23-25</sup> have demonstrated that neonatally engrafted  
32 human neural or macroglial (oligodendroglial and astroglial) progenitor cells can largely repopulate and  
33 functionally integrate into the adult host rodent brain or spinal cord, generating widespread chimerism.  
34 This human-mouse chimeric approach provides unique opportunities for studying the pathophysiology  
35 of the human cells within an intact brain. In this study, we developed a hPSC microglial chimeric mouse  
36 brain model, by transplanting hPSC-derived microglia into neonatal mouse brains. The engrafted  
37 hPSC-derived microglia can proliferate, migrate, and widely disperse in the brain. We hypothesize that  
38 the limited functional maturation of hPSC-derived microglia in *in vitro* models is primarily caused by the  
39 fact that those microglia are maintained in an environment that lacks the complex cell-cell/cell-matrix  
40 interactions existing in an *in vivo* brain environment<sup>8</sup>. To test this hypothesis, we employed single-cell  
41 RNA-sequencing to examine the gene expression profile of hPSC-derived microglia developed for six  
42 months in the mouse brain.

## 1 Results

### 2 3 Generation of hPSC microglial chimeric mouse brains

4 Microglia originate from yolk sac erythromyeloid progenitors (EMPs) during primitive hematopoiesis.  
5 EMPs further develop to primitive macrophage precursors (PMPs) that migrate into the developing neural  
6 tube and become microglia with ramified processes within the CNS environment<sup>1</sup>. We first derived PMPs  
7 from hPSCs, including one human induced pluripotent stem cell (hiPSC) line and one human embryonic  
8 stem cell (hESC) line, using a published protocol<sup>18</sup>. Briefly, the yolk sac embryoid bodies (YS-EBs) were  
9 generated by treating the EBs with bone morphogenetic protein 4 (BMP4), vascular endothelial growth  
10 factor (VEGF), and stem cell factor (SCF). Next, the YS-EBs were plated into dishes with interleukin-3  
11 (IL-3) and macrophage colony-stimulating factor (M-CSF) to promote myeloid differentiation. At 2–3  
12 weeks after plating, hPSC-derived hPMPs emerged into the supernatant and were continuously produced  
13 for more than 3 months. The cumulative yield of PMPs was around 40-fold higher than the number of  
14 input hPSCs (Figure 1A), similar to the results from previous studies<sup>16, 18</sup>. PMPs are produced in a Myb-  
15 independent manner that closely recapitulated primitive hematopoiesis<sup>1</sup>. We confirmed the identity of  
16 these hPSC-derived PMPs by staining with CD235, a marker for YS primitive hematopoietic progenitors  
17<sup>26, 27</sup>, and CD43, a marker for hematopoietic progenitor-like cells<sup>26, 27</sup>. As shown in Figure 1B, over 95%  
18 of the hPSC-derived PMPs expressed both markers. Moreover, the human PMPs are highly proliferative  
19 as indicated by Ki67 staining ( $95.4 \pm 2.2\%$ ,  $n = 4$ ) (Figure 1B). Using this method, we routinely obtain  
20 ample numbers of hPSC-derived PMPs with high purity as required for cell transplantation experiments.

21 We engrafted hPSC-derived PMPs into the brains of postnatal day 0 (P0) immunodeficient mice  
22 that are Rag2/IL2 $\gamma$ -deficient and also express the human forms of CSF1, which facilitates the survival  
23 of xenografted human myeloid cells and other leukocytes. We deposited cells into the white matter  
24 overlying the hippocampus and sites within the hippocampal formation (Figure 1C). In order to visualize  
25 the distribution of donor-derived microglia, at 6 months post-transplantation, we stained the mouse  
26 brain sections with human-specific antibody recognizing TMEM119 (hTMEM119). TMEM119 is a  
27 marker that is only expressed by microglia, but not other macrophages<sup>14, 17, 28</sup>. We found that the  
28 donor-derived hTMEM119<sup>+</sup> microglia migrated long distances along the corpus callosum to reach the  
29 olfactory bulb (Figure 1D). This is consistent with the observation in the developing brain that microglia  
30 use white matter tracts as guiding structures for migration and that they enter different brain regions<sup>29</sup>.  
31 As early as 3 weeks post-transplantation, donor-derived microglia had already migrated along corpus  
32 callosum and passed through the rostral migratory stream to the olfactory bulb (Figure 1E). At 6 months  
33 post-transplantation, human microglia widely dispersed in multiple brain regions, including olfactory  
34 bulb, hippocampus, and cerebral cortex, and exhibited a highly ramified morphology (Figure 1F and G)  
35 typical of resting microglia. Similar to our previous studies<sup>24, 25</sup>, we assessed the engraftment  
36 efficiency and degree of chimerization by quantifying the percentage of hTMEM119<sup>+</sup> cells among total  
37 DAPI<sup>+</sup> cells in the forebrain in sagittal brain sections covering regions from 0.3 to 2.4 mm lateral to  
38 midline and found that about 8% of the total cells were human microglia in the 6-month-old mouse  
39 brains (Figure 1D and L). Frequently, we also observed clusters of human microglia in the cerebellum  
40 (Figure 1H), which might be a result from the strong ability of immune cells trafficking along blood  
41 vessels and/or the choroid plexus<sup>30</sup>. These results demonstrate that hPSC-derived PMPs survive in  
42 mouse brain and that they migrate to a variety of structures.

43 To examine whether transplanted hPSC-derived PMPs efficiently differentiated to microglia in  
44 the mouse brain, we double-stained brain sections for both human nuclei (hN) and hTMEM119. As  
45 early as 8 weeks post-transplantation, the vast majority of hN<sup>+</sup> PMPs ( $92.3 \pm 1.5\%$ ,  $n = 10$ ) were positive  
46 for hTMEM119 (Figure 1I and M), indicating the robust and efficient differentiation of hPSC-derived  
47 PMPs into microglia. Moreover, the vast majority of the donor-derived cells expressed PU.1, a  
48 transcription factor that is necessary for microglial differentiation and maintenance<sup>31-34</sup>, and were  
49 positive for human specific CD45 (hCD45), which is expressed by all nucleated hematopoietic cells<sup>35,</sup>  
50<sup>36</sup>. Furthermore, we assessed the proliferation of engrafted cells by staining the proliferative marker  
51 Ki67. As shown in Figure 1K and N, at 3 weeks post-transplantation, about 17% ( $16.9 \pm 5.7\%$ ,  $n = 8$ ) of

1 hN<sup>+</sup> transplanted cells expressed Ki67, indicating that these cells were capable of proliferating in the  
2 mouse brain. At 6 months post-transplantation, the percentage of proliferating cells dramatically  
3 decreased and less than 2% ( $1.7 \pm 0.8\%$ ,  $n = 7$ ) of total engrafted cells were Ki67 positive. These Ki67<sup>+</sup>  
4 proliferating human cells mainly localized in the subventricular zone, the walls along lateral ventricles,  
5 corpus callosum, and olfactory bulb (Figure 1K and supplementary Figure 1B). Taken together, these  
6 findings demonstrate that engrafted hPSC-derived PMPs differentiate to microglia, generating a mouse  
7 brain with a high degree of human microglial chimerism in the forebrain.

## 9 **Human PSC-derived microglia undergo morphological maturation and are functional in the mouse** 10 **brain**

11 Compared with three weeks post-transplantation, hPSCs-derived microglia appeared to exhibit more  
12 complex processes at 6 months post-transplantation (Figure 1E and F). Moreover, even at the same  
13 stage, hPSC-derived microglia in the cerebral cortex seemed to exhibit much more complex  
14 morphology, compared with the hPSCs-derived microglia in the corpus callosum and cerebellum  
15 (Figure 1G and H, supplementary Figure 1B and 2A). In the corpus callosum, hPSC-derived microglia  
16 had fewer branches that aligned with axons; and in the cerebral cortex, the microglia exhibited more  
17 complex and ramified processes (supplementary Figure 1B and 2A), similar to the observation from  
18 previous studies<sup>29, 37</sup>. This prompted us to further examine the morphological and functional changes of  
19 the hPSC-derived microglia along with the development of the mouse brain, particularly in cerebral  
20 cortex. Previous studies have shown that there are not changes in microglial number, cytokine levels,  
21 and gene expression profiles between wild type and *Rag2*<sup>-/-</sup> mice<sup>38</sup>. Building upon that, we also  
22 compared the differences between xenografted hPSC-derived microglia vs. host mouse microglia. We  
23 double-stained the brain sections with human and mouse specific TMEM119 (hTMEM119 and  
24 mTMEM119, respectively) antibodies to distinguish hPSC-derived microglia and mouse host microglia.  
25 As shown in Figure 2A, in 6 months old mice, both hPSCs-derived microglia and mouse microglia were  
26 seen in the cerebral cortex and hippocampus. Notably, hPSCs-derived microglia seemed to expel  
27 mouse microglia, as indicated by the observation that mouse microglia mainly resided in distal regions  
28 in the cerebral cortex and hippocampus. Particularly, in the corpus callosum, mouse microglia were  
29 rarely seen, and the vast majority of microglia were hPSC-derived microglia, indicating that hPSC-  
30 derived microglia replaced the host mouse microglia. In the cerebral cortex, hTMEM119<sup>+</sup> hPSC-derived  
31 microglia exhibited much more complex processes at 8 weeks and 6 months post-transplantation than  
32 those cells at 3 weeks post-transplantation, as indicated by the increased number of endpoints (Figure  
33 2C). The total length of processes of hPSC-derived microglia also significantly increased from week 3  
34 to week 8 and month 6 (Figure 2D), suggesting the gradual maturation of hPSC-derived microglia in  
35 mouse brain. We further examined the morphological differences between hPSC-derived microglia vs.  
36 mouse microglia at the same time points after transplantation. In the cerebral cortex, at 3 weeks post  
37 transplantation, compared with hPSC-derived microglia, mouse microglia showed a significantly higher  
38 number of endpoints and a slight trend of longer processes (Figure 2C and 2D). However, at 8 weeks  
39 post-transplantation, there was no significant difference in endpoint number and process length  
40 between hPSC-derived microglia and mouse microglia (Figure 2C and 2D). Interesting, at 6 months  
41 post-transplantation, hPSC-derived microglia exhibited a significantly higher number of endpoints and  
42 longer process length than mouse microglia. Since microglial morphology is inextricably linked to their  
43 phagocytic functions<sup>39, 40</sup>, we examined the expression of CD68, a lysosomal marker indicative of the  
44 phagocytic activity of microglia<sup>41</sup>. In the cerebral cortex, CD68 was expressed in vast majority of the  
45 hPSC-derived microglia at 3 weeks post-transplantation ( $33.9 \pm 3.7\%$ ) and its expression dramatically  
46 decreased from 8 weeks to 6 months post-transplantation (Figure 2G and E). We observed some  
47 hTMEM119/CD68<sup>+</sup> cells at 3 weeks and nearly no hTMEM119/CD68<sup>+</sup> cells at 6 months post-  
48 transplantation (Figure 2G), suggesting that nearly no host mouse microglia expressed CD8 at 6  
49 months post-transplantation. Microglia have been shown to shape synapse formation by pruning  
50 synapses and to maintain oligodendroglial homeostasis, by phagocytizing oligodendroglial cells<sup>42-44</sup>.  
51 We then investigated whether hPSCs-derived microglia were also able to prune synapse in the mouse

1 brain. By double staining human microglia marker hCD45 with a synapse marker PSD95, we found that  
2 some PSD95<sup>+</sup> puncta localized inside of the hCD45<sup>+</sup> processes of hPSC-derived microglia. This  
3 engulfment of synaptic materials was observed from 3 weeks to 6 months post-transplantation, most  
4 prominently seen at 8 weeks post-transplantation, diminishing to only a few at 6 months (Figure 2G and  
5 F). By double staining hCD45 with oligodendroglial marker Olig2, we found that hPSCs-derived  
6 microglia in white matter clearly engulfed Olig2<sup>+</sup> oligodendroglia at 3 weeks post-transplantation  
7 (supplementary Figure 2B). Microglia, together with endothelial cells, pericytes and astrocytes, form the  
8 functional blood–brain barrier. We double-stained the brain sections with hCD45 and laminin, a marker  
9 that has been commonly used to visualize vascular structures in the mammalian brain<sup>45</sup>. We found  
10 that hPSC-derived microglia clustered around and were closely affiliated with blood vessels in both grey  
11 matter and white matter across different brain regions including the olfactory bulb (Figure 2H and  
12 supplementary Figure 2C). Taken together, hPSC-derived microglia show variable morphologies in a  
13 spatiotemporal manner, morphologically differ from the host mouse microglia, and are functional in  
14 mouse brain.

### 15 16 **Single-cell RNA-sequencing of hiPSC microglial chimeric mouse brain identifies a gene 17 expression signature consistent with adult human microglia**

18 Homeostatic human microglia at adult stages are difficult to obtain, because microglia are highly  
19 sensitive to environmental changes and microglia derived from adult human brain tissue-derived are  
20 usually purified through multi-step procedures that can change their biological properties significantly<sup>8</sup>.  
21 In addition, microglia derived from hPSCs using all current differentiation protocols largely resemble  
22 fetal or early postnatal human microglia<sup>16, 18, 20</sup>. We hypothesize that hPSC microglial chimeric mice  
23 may provide a unique opportunity to study biological properties of adult human microglia, because the  
24 engrafted hPSC-derived microglia are likely to exhibit an expedited maturation process promoted by the  
25 maturing environment in the mouse brain. To test this hypothesis, we examined transcriptomic profiles  
26 of hiPSC-derived microglia developed in the *in vivo* homeostatic mouse environment using single-cell  
27 RNA-sequencing (scRNA-seq). We collected brain regions where engrafted hiPSCs-derived microglia  
28 preferentially dispersed, including the cerebral cortex, hippocampus, corpus callosum, and olfactory  
29 bulb, from 6-month-old chimeric mouse brain for scRNA-seq. Owing to the wide distribution and high  
30 abundance of hiPSC-derived microglia in those brain regions, we were able to capture ample number  
31 of hiPSC-derived microglia for scRNA-seq without using FACS sorting, which has the potential to  
32 impact transcriptional profiles through extended *ex vivo* manipulation. After brain tissue dissociation  
33 with papain and centrifugation to remove debris and myelin, single cell suspensions were directly  
34 subjected to droplet-based 10X Genomic RNA-seq isolation (Fig. 3A). Using stringent criteria, 29,974  
35 cells passed the quality control evaluation (with about 10,000–15,000 reads/cell) from 4 animals for  
36 downstream analysis (Fig. S3A).

37 We performed dimensionality reduction and clustering using a principal component analysis  
38 (PCA)-based approach. Using t-distributed stochastic neighbor embedding (t-SNE) to visualize cell  
39 clustering, we identified 11 clusters, including a cluster of xenografted hiPSC-derived microglia, which  
40 we named Xeno MG (Fig. 3B). This clustering pattern was consistently seen in all four animals,  
41 indicating the high reproducibility of the sequencing and clustering procedures (Fig. S3B). We defined  
42 each cluster based on the expression of enriched genes (Table S1) that could be recognized as  
43 markers for specific cell types or are reported to be abundantly expressed in specific cell types (Figure  
44 3C and Figure S3C). The clusters included 10 mouse cell types: astrocytes (*SCL6A11*<sup>46</sup>, *NTSR2*<sup>47</sup>),  
45 oligodendrocytes (*CLDN11*<sup>48</sup>, *CNP*<sup>49</sup>), oligodendrocyte progenitor cells (OPC; *PDGFR $\alpha$* , *OLIG2*<sup>50</sup>),  
46 excitatory neurons (*SYT1*<sup>51</sup>, *SNAP25*<sup>52</sup>), neuronal precursors (*SOX11*,<sup>53</sup> *STMN2*,<sup>54</sup>), vascular cells  
47 (*MYL9*<sup>55</sup>, *MGP*<sup>56</sup>), choroid cells (*LCN2*<sup>57</sup>, *1500015O10Rik*<sup>58</sup>), endothelial cells (*ITM2A*<sup>59</sup>, *FLT1*<sup>60</sup>),  
48 GABAergic neuron (*NPY*<sup>61</sup>, *NR2F2*<sup>62</sup>) and mouse microglia (*CTSS*, *HEXB*<sup>8</sup>). The only human cell  
49 cluster, labeled Xeno MG, preferentially expressed the microglial markers *SPP1* and *CD74*, and  
50 accounted for about 7% of total cells (Figure S3D). Of note, a cross-correlation analysis of clustered  
51 cell types showed that Xeno MG had a highest correlation coefficient value (0.765) with mouse

1 microglia, consistent with a microglial identity of the engrafted human cells (Figure S3E). Furthermore,  
2 the expression of a set of canonical microglial genes (*C1QA*, *CX3CR*, *TREM2*, *CSFRR*, and *P2RY12*)  
3 was only detected in Xeno MG and mouse microglia clusters (Figure 3D). We examined the expression  
4 of the top 30 human microglial signature genes reported by a previous study<sup>8</sup>. We found that the vast  
5 majority of human microglia signature genes were exclusively or abundantly expressed in Xeno MG, as  
6 compared to the other types of cells in chimeric mouse brains (Figure 3E). Furthermore, we compared  
7 the transcriptomic profile of Xeno MG with a published dataset generated from human brain tissue-  
8 derived human microglia<sup>12</sup>. A significant correlation was observed between Xeno MG and the published  
9 dataset<sup>12</sup> (Figure S4A), further confirming the human microglial identity of the engrafted human cells.  
10 As shown in Figures 1 and 2, the highly ramified morphology of hiPSC-derived microglia strongly  
11 indicate that they exhibit a quiescent and non-activated state. To confirm this, we examined expression  
12 of several pro-inflammatory cytokines to assess the impact of the tissue preparation procedures on the  
13 microglial state. We found very minor expression of acute pro-inflammatory cytokines such as IL-1 $\beta$ , IL-  
14 1 $\alpha$  and TNF- $\alpha$ <sup>63, 64, 65</sup> (Figure S4B). In contrast, the pro-inflammatory cytokine, IL-6 and an anti-  
15 inflammatory cytokine, IL-10, were nearly undetectable, and expression of these pro-inflammatory  
16 cytokines is often correlated with a longer-lasting inflammatory response<sup>64, 65</sup>. This observation  
17 suggests that only a very mild inflammatory reaction was likely triggered in the Xeno MG during sample  
18 preparation, similar to previous reports<sup>44, 63</sup>. These results demonstrate that Xeno MG developed in the  
19 mouse brain largely retain their human microglial identity and exhibit a gene expression pattern  
20 characteristic of physiologically normal human microglia.

21 Next, to explore the maturation of Xeno MG in chimeric mouse brains, we compared the global  
22 expression patterns of 547 genes which were previously identified as aging-regulated genes using  
23 human microglia derived from individuals ranging from ages 34 to 102<sup>12</sup>, between our Xeno MG and  
24 published datasets of hiPSC-derived microglia cultured under 2-dimensional (2D) conditions (iPS  
25 MG)<sup>17, 66</sup>, hiPSC-derived microglia developed in 3D cerebral organoids (oMG)<sup>67</sup>, brain-tissue derived  
26 adult human microglia (adult MG)<sup>12, 67</sup>, as well as blood/liver macrophages<sup>17, 66</sup>. As shown in Figure 3F,  
27 a principal component analysis (PCA) demonstrated that Xeno MG were markedly distinct from  
28 blood/liver macrophages. Evaluating maturity, the iPS MG cultured under 2D conditions most  
29 resembled fetal microglia, which is consistent with previous reports<sup>14, 16</sup>. The oMG developed in  
30 organoids showed more mature characteristics, intermediate between fetal and adult microglia along  
31 the first principal component, but still quite distinct from the cluster of adult MG. Remarkably, our Xeno  
32 MG clusters intermingled with a cluster of adult MG samples, indicating their resemblance to adult  
33 human microglia (Figure 3F). Recent unbiased hierarchical clustering analyses revealed four major  
34 subclasses of adult human microglia derived from human brain tissue<sup>68</sup>. To determine if Xeno MG also  
35 exhibited similar heterogeneity in chimeric mouse brain, we examined the expression of the most  
36 differentially regulated genes identified from the different subclasses of adult human microglia<sup>68</sup>. Gene  
37 expression analysis revealed that *CD74*, *SPP1*, *C3*, and *CST3*, which were highly expressed in all  
38 subclasses in adult human microglia, had a similarly uniform pattern of expression among most Xeno  
39 MG cells. Moreover, a chemokine gene *CCL4*, the zinc finger transcription factors *EGR1*, *EGR2* and  
40 *EGR3*, *CD83*, and *MCL1*, which are each characteristically expressed in individual subclasses of  
41 human microglia, similarly had upregulated expression in distinct subpopulations of Xeno MG (Figure  
42 3G, Figure S4C). Taken together, these results demonstrate that Xeno MG developed in the mouse  
43 brain highly resemble adult human microglia and faithfully recapitulate heterogeneity of adult human  
44 microglia.

#### 45 46 **Transcriptomic profiling analysis reveals differences between co-resident Xeno MG and mouse** 47 **microglia**

48 Previous studies reported differences in transcriptomic profiles between human and mouse microglia<sup>8</sup>.  
49<sup>12</sup>. In the chimeric mouse brain, as xenografted hiPSC-derived microglia and host mouse microglia  
50 developed in the same brain environment, this model may provide a unique opportunity to directly  
51 examine the differences between human and mouse microglia. Xeno MG and host mouse microglia

1 clusters obtained from 4 independent samples of 6-month-old chimeric mouse brains were used for the  
2 following comparison (Figure 4A). We first compared the average levels of microglial gene transcripts in  
3 Xeno MG with orthologous gene transcripts in host mouse microglia. Consistent with previous findings  
4<sup>8, 12</sup>, the comparison between Xeno MG and mouse microglial transcriptomes demonstrated similar  
5 gene expression patterns overall ( $r^2 = 0.553$ ;  $p < 2.2 \times 10^{-16}$ ), and the majority of orthologous genes  
6 pairs (14,488 of 15,058; 96.2%) were expressed within a twofold range (Figure 4B). Using a cut-off of  
7 2-fold difference and an FDR of 0.05, we identified that 248 gene transcripts were preferentially  
8 expressed in human microglia, whereas 247 gene transcripts were preferentially expressed in mouse  
9 microglia (Figure 4D, Table S2). Importantly, previously-reported signature genes expressed in human  
10 microglia<sup>8</sup>, including *SPPI*, *A2M*, and *C3*, and signature genes expressed in mouse microglia, including  
11 *HEXB*, *SPARC*, and *SERINC3*, were all differentially expressed in our sequencing data (Figure 4B and  
12 C), indicating the high fidelity of our samples in resembling previously-identified human vs. mouse  
13 microglial gene expression profiles. To explore the function of genes that were highly expressed human  
14 microglia, we further performed Gene Ontology (GO) term analysis. Many significantly enriched terms  
15 were associated with the innate immune activity of microglia, such as “immune system response,”  
16 “regulation of immune system process response,” and “leukocyte activation,” which is consistent with a  
17 recent study<sup>12, 69</sup>. In addition, we observed enrichment of genes associated with “regulation of cell  
18 adhesion,” “cytoplasmic translation,” and “peptide biosynthetic process” (Figure 4E). These results  
19 suggest that compared to the host mouse microglia, Xeno MG may be more immunocompetent, as  
20 they express an enriched set of immune receptors and ligands.

21 Previous studies have shown that several disease risk genes, such as genes associated with  
22 AD, Parkinson’s disease (PD), multiple sclerosis (MS), and schizophrenia (SCZ), are preferentially  
23 expressed in microglia<sup>8, 69, 70</sup>. Moreover, relative expression of these genes in human and mouse  
24 microglia are also different<sup>8</sup>. Therefore, we examined the expression of disease risk genes in Xeno MG  
25 and mouse microglia from our chimeric mouse brain preparation. Expression of disease risk genes, as  
26 reported in a recent study<sup>8</sup>, had a highly similar differential expression pattern in co-resident mouse  
27 and human microglia (Figure 4F, G and Figure S4D, S4E). Specifically, with respect to AD, we found  
28 that out of 14 AD genes, 10 genes, including *Apoc1*, *Sorl2*, and *Mpzl1*, were more abundantly  
29 expressed in Xeno MG than in mouse microglia (Figure 4F and H). Similarly, out of the 20 PD genes  
30 listed in a previous report<sup>8</sup>, 18 genes, such as *Vps13c*, *Snca*, *Fgf20*, *Mnrrn1*, and *Lrrk2*, had the same  
31 trend of differential expression with greater expression in Xeno MG than in mouse microglia (Figure 4G  
32 and H). We also found that some of the disease genes were preferentially expressed in mouse  
33 microglia, such as *Syt11* and *Gba* in PD. Altogether, these observations demonstrate that our hPSC  
34 microglial chimeric mouse brain can faithfully model the transcriptomic differences between human and  
35 mouse microglia, and this new model will serve as a new tool for modeling human neurological  
36 disorders that involve dysfunction of microglia.



## 1 Discussion

2  
3 Humanized mouse models, in which the immune system is reconstituted by cells of human origin, have  
4 been well-established and provide powerful tools for studying cancer, inflammatory and infectious  
5 disease, and human hematopoiesis<sup>71</sup>. However, there are no previous studies reporting a mouse  
6 model in which the brain is largely repopulated by human brain-resident immune cells, microglia. In this  
7 study, by engrafting neonatal mice with hPSC-derived PMPs, we demonstrate the generation of  
8 chimeric mouse brains in which hPSC-derived microglia widely disperse. We propose that the following  
9 three reasons may account for the generation of human microglial chimeric mouse brain. First, as  
10 compared to other types of neural cells, microglial cells are unique in that they turn over remarkably  
11 quickly, allowing the vast majority of the population to be renewed several times during a lifetime<sup>72-74</sup>.  
12 Previous studies have shown that neonatally transplanted human macroglial or neural progenitor cells  
13 can outcompete and largely replace the host mouse brain cells<sup>21, 22, 75</sup>. In this study, we also observe  
14 that the hPSC-derived PMPs are highly proliferative prior to transplantation and transplanted cells  
15 divide for at least 6 months in the mouse host brain. Therefore, the nature of high turnover rate of  
16 microglia and the competitive advantage of engrafted human cells over endogenous mouse cells may  
17 result in a large number of human donor-derived microglia and brain regions being repopulated by  
18 hPSC-derived microglia in the mouse brain at 6 months. Second, during early brain development,  
19 microglial cells use blood vessels and white matter tracts as guiding structures for migration and enter  
20 all brain regions<sup>29</sup>. Thus, transplantation of hPSC-derived PMPs to the anterior anlagen of the corpus  
21 callosum of the neonatal mouse brain in this study may facilitate migration of donor cell-derived  
22 microglia, resulting in wide dispersion of hPSC-derived microglia into different brain regions. In addition,  
23 in support of this concept, we also observe that in the mouse brain, hPSC-derived microglia are  
24 concentrated around and have close contact with blood vessels in both grey matter and white matter.  
25 Lastly, although previous studies have also transplanted hPSC-derived microglia into mouse brains, the  
26 generation of chimeric mice with a high degree of human microglial brain chimerism has not been  
27 reported<sup>16, 76</sup>. We propose that this might be because of the age of the host animals used for cell  
28 transplantation. Previous studies used adult animals for cell transplantation<sup>16, 76</sup>. In our study, we  
29 transplanted hPSC-derived PMPs into the mouse brain at the earliest postnatal age, P0, as in general  
30 the neonatal brain is more receptive for the transplanted cells and more conducive for their survival and  
31 growth<sup>21, 22, 24</sup>. Moreover, in contrast to studies that examined donor-derived microglia 2 months after  
32 transplantation, we characterized the donor-derived microglia up to 6 months post-transplant, which  
33 allowed the donor cells to develop for a longer term in the mouse brain.

34 Remarkably, the single-cell sequencing analysis demonstrates that xenografted hiPSC-derived  
35 microglia developed in the mouse brain retain a human microglial identity, as indicated by exhibiting a  
36 human microglia-specific transcriptomic signature. More importantly, xenografted hiPSC-derived  
37 microglia showed expression patterns of microglial maturity resembling adult human microglia derived  
38 from human brain tissue. Therefore, establishment of such a hiPSC microglial chimeric mouse model  
39 provides novel opportunities for understanding the biology of human microglia. First, this proof-of-  
40 concept study paves the path to interrogating the species differences between human vs. mouse  
41 microglia at molecular, functional, and behavioral levels using this hiPSC microglia chimeric mouse  
42 brain model. It has been increasingly recognized that as compared to mouse microglia, human  
43 microglia possess unique features under conditions of development, aging and disease<sup>8, 11-13</sup>. In our  
44 model, human and mouse microglia develop in the same brain, but we have observed that human  
45 microglia are morphologically distinct from their mouse counterparts and also exhibit signature gene  
46 expression profiles characteristic of human microglia isolated from brain. Microglia are intimately  
47 involved in processes of neuronal development, such as neurogenesis, synaptogenesis, and synaptic  
48 pruning<sup>77-79</sup>. Building upon the differential expression profiles, our model will be useful to investigate  
49 how human and mouse microglia function differently in shaping neuronal development. Moreover, this  
50 hiPSC microglial chimeric mouse model will provide unprecedented opportunities to understand how  
51 the inclusion of human microglia in the developing brain ultimately impacts behavioral performance of

1 the animals. Second, several transcriptomic studies<sup>12, 20</sup> have clearly demonstrated that microglial  
2 genes are differently regulated during aging and neurodegeneration between mice and humans,  
3 indicating the importance of developing a human microglia model to study human microglial function  
4 across different development stages, particularly adult microglia for studying aging-related and  
5 neurodegenerative disorders. PCA analysis of aging-regulated genes demonstrates that in contrast to  
6 hiPSC-derived cultured under 2D or 3D organoid conditions, xenografted hiPSC-derived microglia were  
7 indistinguishable from adult human microglia. Combining this with human iPSC technologies, such as  
8 the availability of edited, isogenic cells with or without disease-related genes, the hiPSC microglia  
9 chimeric mouse model will be informative in teasing out the roles of human microglia in  
10 neurodevelopmental disorders, neurodegenerative disorders, as well as brain infections by viruses  
11 such as Zika virus and HIV-1.

12 Similar to reports of hiPSC macroglial or neuronal chimeric mouse brain models<sup>21, 22, 24</sup>, in the  
13 current hPSC microglial chimeric mouse model, the endogenous mouse counterpart cells are still  
14 present. In contrast to macroglial cells and neurons, microglial cells can be acutely depleted (up to 99%  
15 depletion) in the entire brain without significantly affecting the viability of animals, by pharmacologically  
16 inhibiting signaling pathways that are important for the survival and development of microglia, such as  
17 colony-stimulating factor 1 (CSF1) signaling<sup>80</sup> or by genetically coupling suicide genes under the  
18 control of promoters of microglia-specific genes<sup>1, 81</sup>. In future studies, it will be interesting to explore the  
19 possibility of creating humanized mouse brains containing solely hiPSC-derived microglia, by depleting  
20 endogenous mouse microglia using pharmacological or genetic approaches in neonatal mouse brains  
21 prior to engraftment of hiPSC-derived microglia. In addition, co-transplantation of human PSC-derived  
22 PMPs and neural or macroglial progenitors may generate chimeric mouse brain containing human  
23 microglia, neurons, and macroglial cells. Currently, in this proof-of-concept hPSC microglial chimeric  
24 mouse brain model, there is a lack of peripheral adaptive immune system in the host due to a *Rag2*<sup>-/-</sup>  
25 mutation. To circumvent this limitation, hiPSC-derived PMPs can be transplanted into animals in which  
26 the immune system is humanized by the same hiPSC-derived hematopoietic stem cells<sup>32, 82, 83</sup>. This will  
27 further allow the generation of animals with isogenic adaptive immune system and brain innate immune  
28 system derived from the same human individuals. Combined with recently developed hiPSC cerebral  
29 organoid models that contain microglia<sup>16, 67</sup>, chimeric mouse brain models may help further our  
30 understanding of the complex interactions between human microglia and human neurons and  
31 macroglial cells under normal and disease conditions.

## 1    **METHOD DETAILS**

### 3    **Generation, culture, and quality control of hPSC lines.**

4    One healthy control hiPSC line and H9 ESC line were used this study. The hiPSC line were generated  
5    from healthy person-derived fibroblasts using the “Yamanaka” reprogramming factors, as reported in  
6    our previous study<sup>84</sup>. The hiPSC line has been fully characterized by performing karyotyping, teratoma  
7    assay, DNA fingerprinting STR (short tandem repeat) analysis, gene expression profiling, and Pluritest  
8    (www.PluriTest.org), a robust open-access bioinformatic assay of pluripotency in human cells based on  
9    their gene expression profiles<sup>85</sup>, as described in our previous study<sup>84</sup>. The hPSCs were maintained  
10    under feeder-free condition and cultured on dishes coated with hESC-qualified Matrigel (Corning) in  
11    mTeSR1 media (STEMCELL Technologies). The hPSCs were passaged approximately once per week  
12    with ReLeSR media (STEMCELL Technologies). All the hPSC studies were approved by the  
13    committees on stem cell research at Rutgers University.

### 15    **PMP generation and culture**

16    PMP were generated from hiPSCs and H9 hESCs, using a published protocol<sup>18</sup>. Briefly, the yolk sac  
17    embryoid bodies (YS-EBs) were generated by treating the EBs with bone morphogenetic protein 4  
18    (BMP4, 50 ng/ml, Peprotech; to induce mesoderm), vascular endothelial growth factor (VEGF, 50  
19    ng/ml, Peprotech; endothelial precursors), and stem cell factor (SCF, 20 ng/ml, Miltenyi Biotech;  
20    hematopoietic precursors). Next, the YS-EBs were plated into dishes with interleukin-3 (IL-3, 25 ng/ml,  
21    Peprotech) and macrophage colony-stimulating factor (M-CSF, 100 ng/ml, Invitrogen) to promote  
22    myeloid differentiation. At 2–3 weeks after plating, human hPMPs emerged into the supernatant and  
23    were continuously produced for more than 3 months. The cumulative yield of PMPs was around 40-fold  
24    higher than the number of input hPSCs (Figure 1A), similar to the previous studies<sup>16,18</sup>. PMPs were  
25    produced in a Myb-independent manner and closely recapitulating primitive hematopoiesis<sup>1</sup>.

### 27    **Animals and Cell transplantation**

28    PMP were collected from supernatant and suspended as single cells at a final concentration of 100,000  
29    cells per  $\mu$ l in PBS. The cells were then injected into the brains of P0 Rag2<sup>-/-</sup>hCSF1 immunodeficient  
30    mice (C;129S4-Rag2<sup>tm1.1Flv</sup> Csf1<sup>tm1(CSF1)Flv</sup> Il2rg<sup>tm1.1Flv</sup>/J, The Jackson Laboratory). The precise  
31    transplantation sites were bilateral from the midline =  $\pm$  1.0 mm, posterior bregma = -2.0 mm, and  
32    dorsoventral depth = -1.5 and -1.2 mm (Figure 1C). The mouse pups were anesthetized by placing  
33    them on ice for 5 minutes. Once cryo-anesthetized, the pups were placed on a digital stereotaxic device  
34    (David KOPF Instruments), equipped with a neonatal mouse adaptor (Stoelting). The pups were then  
35    injected with 0.5  $\mu$ l of cells into each site (total 4 sites) by directly inserting Hamilton needles through  
36    the skull into the target sites. The pups were weaned at 3 weeks and were kept up to 6 months before  
37    they were tested for the engraftment of human cells. All animal work was performed without gender  
38    bias under the Institutional Animal Care and Use Committee (IACUC) protocol approved by Rutgers  
39    University IACUC Committee.

### 41    **Sample preparation and library construction for Single-cell RNA sequencing**

42    Six months old chimeric mice that received transplantation of microglia derived from the hiPSC line  
43    were used for single-cell RNA-sequencing experiments. The mice were perfused with oxygenated  
44    solution (2.5 mM KCl, 87 mM NaCl, 1.25 mM NaH<sub>2</sub>PO<sub>4</sub>, 26 mM NaHCO<sub>3</sub>, 75 mM sucrose, 20 mM  
45    glucose, 2 mM MgSO<sub>4</sub>, and 1 mM CaCl<sub>2</sub>) as reported<sup>86</sup> and the brain was quickly extracted and kept in  
46    the same cold solution for vibratome (VT1200, Leica) sectioning (500 $\mu$ m thickness) and dissection. The  
47    brain regions were isolated from where engrafted hiPSCs-derived microglia largely dispersed, including  
48    the cerebral cortex, hippocampus, corpus callosum, and olfactory bulb. The selected regions were  
49    chopped with Spring Scissors (WPI) into fine pieces for further dissociation into single cells, based on  
50    10x Genomic Sample Preparation Domstratd Protocol (Dissociation of Mouse Embryonic Neural  
51    Tissue) with modifications. Briefly, the pieces were collected and dissociated with the Papain (1mg/ml,

1 Sigma) and DNAase I (100 unit/ml, Roche) in Hibernate solution (Gibco) in 37°C for 20 minutes.  
2 Tissues were washed and triturated with wide-bore tips in cold Hibernate solution until no visible  
3 chunks. The samples were spun down in 200 rcf for 2 minutes in 4°C and filtered through 30 µm cell  
4 strainer to obtain single cells for cell counting and library preparation. To generate libraries, 20,000 cells  
5 were loaded for each sample. cDNA libraries were generated following the manufacturer instructions.  
6

### 7 **Single-cell RNA sequencing**

8 Single cell RNA sequencing was performed by RUCDR<sup>®</sup> Infinite Biologics at Rutgers by using a 10X  
9 Genomics single cell gene expression profiling kit. The libraries were analyzed on Agilent 4200  
10 TapeStation System using High Sensitivity D1000 ScreenTape Assay (Cat #: 5067-5584) and  
11 quantified using KAPA qPCR (Cat # KK4835). Libraries and then normalized to 10nM before being  
12 pooled together. The pooled library was then clustered and sequenced on Illumina HiSeq 2500 in Rapid  
13 Run Mode, using the following parameters: 36bp forward read, 100bp reverse read, and 8bp index  
14 read. For each individual library, the sequencing data from 4 unique indexes were combined before  
15 further analysis.

16 Sequencing reads were aligned with pooled mouse (mm10) and human (hg19) reference  
17 genomes and the barcodes were interpreted using Cellranger software (10X Genomics, v. 3.0.0). The  
18 resulting matrices of gene counts x barcodes were coded by individual sample identifier and loaded into  
19 Seurat (v. 2.3.4) software<sup>87-89</sup> in R/Bioconductor<sup>90</sup>. An initial analysis revealed a distinct cluster of  
20 human-expressing cells. To compare expression across species, a strategy was employed similar to  
21 one used previously<sup>91</sup>. A table of 17,629 unique matching genes was prepared, starting with a human-  
22 mouse gene homology list obtained from Jackson Labs  
23 (<http://www.informatics.jax.org/downloads/reports/index.html#marker>), and hand-curating to remove  
24 duplicates (Table S3). Sample/barcode identifiers for the human-specific data were isolated and  
25 matching gene symbols were converted from human to mouse. Sample/barcode identifiers not  
26 matching this cluster were assumed to be mouse, and these were trimmed to retain only mouse gene  
27 symbols matching the homology list. The resulting tables were merged for subsequent analysis in  
28 Seurat.

29 For comparisons among sources of human microglia, raw RNAseq reads from the human-  
30 specific cluster were pooled by sample and aligned with reference human genome (hg38) using  
31 HISAT2<sup>92</sup>. Raw sequencing reads from other publications were downloaded from GEO (series  
32 accessions GSE99074<sup>12</sup>, GSE97744<sup>17</sup>, and GSE102335<sup>67</sup>). Since most of these used a different  
33 single-cell sequencing technology which produced larger numbers of reads (~80M vs. an average of  
34 8M from each pooled human microglial sample), we randomly down-sampled sequencing reads to  
35 about 10% prior to analysis to prevent inflation of the shallower-read samples upon normalization. After  
36 similar HISAT2 alignment, all count summaries were imported into a DESeq2<sup>93</sup> data model. Expression  
37 data were filtered for genes identified as regulated in human microglia over aging, including 212 up-  
38 regulated and 360 down-regulated genes<sup>12</sup>, and then summarized by principal components analysis in  
39 R.

40 For analysis of human microglial sub-clusters, extracted human sample/barcode were restricted  
41 to human gene symbol results and re-analyzed with Seurat. Gene ontology analysis used the g:Profiler  
42 <sup>94</sup> website (<https://biit.cs.ut.ee/gprofiler/gost>) with lists of gene symbols listed in Supplementary Table 2.  
43

### 44 **Immunostaining and cell counting**

45 Mouse brains fixed with 4% paraformaldehyde were processed and cryo-sectioned for  
46 immunofluorescence staining<sup>95,96</sup>. The primary antibodies were listed in supplementary Table 4. Slides  
47 were mounted with the anti-fade Fluoromount-G medium containing 1, 4,6-diamidino-2-phenylindole  
48 dihydrochloride (DAPI) (Southern Biotechnology). Images were captured with Zeiss 710 confocal  
49 microscope. The analysis of fluorescence intensity was performed using ImageJ software (NIH Image).  
50 The relative fluorescence intensity was presented as normalized value to the control group. The cells  
51 were counted with ImageJ software. For brain sections, at least five consecutive sections of each brain

1 region were chosen. The number of positive cells from each section was counted after a Z projection  
2 and at least 7 mice in each group were counted. Engraftment efficiency and degree of chimerization  
3 were assessed by quantifying the percentage of hN<sup>+</sup> cells among total DAPI<sup>+</sup> cells in sagittal brain  
4 sections, as reported in the previous studies<sup>24, 25</sup>. The cell counting was performed on every fifteenth  
5 sagittal brain section with a distance of 300 μm, covering brain regions from 0.3 to 2.4 mm lateral to the  
6 midline (seven to eight sections from each mouse brain were used).

### 7 8 **Data analysis**

9 All data represent mean ± s.e.m. When only two independent groups were compared, significance was  
10 determined by two-tailed unpaired t-test with Welch's correction. When three or more groups were  
11 compared, one-way ANOVA with Bonferroni post hoc test or two-way ANOVA was used. A P value less  
12 than 0.05 was considered significant. The analyses were done in GraphPad Prism v.5.  
13

1 **Acknowledgements**

2 This work was in part supported by grants from the NIH (R21HD091512 and R01NS102382 to P.J.)  
3 R.P.H. was supported by R01ES026057, R01AA023797, and U10AA008401. We would like to thank  
4 Dr. Brian Daniels from Rutgers University for critical reading of the manuscript.

5

6 **Author Contributions**

7 P.J. and R.X. designed experiments and interpreted data; R.X. carried out most of experiments with  
8 technical assistance from A.B., A.P., and K.K.; R.P.H. performed the gene expression analysis,  
9 interpreted the data, and provided critical suggestions to the overall research direction; P.J. directed the  
10 project and wrote the manuscript together with R.X. and input from all co-authors.

11

12 **Competing Financial Interests**

13 The authors declare no competing financial interests.

1 **Figure legends:**

2  
3 **Figure 1. Generation of hPSC microglial chimeric mouse brains.**

4 (A) A schematic procedure for generating primitive macrophage precursor (PMP) from hiPSCs or  
5 hESCs-derived yolk sac embryoid bodies (YS-EB). Insets: representative bright-field images at different  
6 stages. Scale bars represent 100  $\mu\text{m}$ , 200  $\mu\text{m}$ , and 20  $\mu\text{m}$  as indicated in the images

7 (B) Representative images and quantification of CD235<sup>+</sup>, CD43<sup>+</sup>, CD235<sup>+</sup>/CD43<sup>+</sup>, and Ki67<sup>+</sup> cells in  
8 PMP. Quantification of pooled data from one hiPSC line and one hESC line. The experiments are  
9 repeated for four times ( $n = 4$ ) and for each experiment, the two stem cell lines are used. Data are  
10 presented as mean  $\pm$  s.e.m. Scale bars: 20  $\mu\text{m}$  in the original and enlarged images.

11 (C) A schematic diagram showing that hPSC-derived PMP are engrafted into the brains of P0 *rag2*<sup>-/-</sup>  
12 hCSF1 mice.

13 (D) Representative images from sagittal brain sections showing the wide distribution of xenografted  
14 hPSC-derived microglia at six months post-transplantation. Anti-human-specific TMEM119  
15 (hTMEM119) selectively labels xenografted hPSC-derived microglia. Scale bar: 1 mm.

16 (E-H) Representative images from sagittal brain sections showing the distribution of hTMEM119<sup>+</sup>  
17 xenografted hPSC-derived microglia at 3 weeks and 6 months post-transplantation in different brain  
18 regions. OB, olfactory bulb; RMS, rostral migratory stream; CC, corpus callosum; Hippo, Hippocampus.  
19 Scale bars: 1 mm or 50  $\mu\text{m}$  in the original or enlarged images, respectively.

20 (I) Representative images of hTMEM119<sup>+</sup> cells among the total donor-derived hN<sup>+</sup> cells in grey matter  
21 at 8 weeks post-transplantation. Scale bars, 50  $\mu\text{m}$  or 20  $\mu\text{m}$  in the original or enlarged images,  
22 respectively.

23 (J) Representative images of PU.1- and human-specific CD45 (hCD45)-expressing cells in the donor-  
24 derived hTMEM119<sup>+</sup> cells in different brain regions at 8 weeks post-transplantation. Scale bars, 50  $\mu\text{m}$   
25 or 20  $\mu\text{m}$  in the original or enlarged images, respectively.

26 (L) Quantification of the percentage of hN<sup>+</sup> cells in total DAPI<sup>+</sup> cells in the forebrain at 6 months post-  
27 transplantation ( $n = 10$  mice). The data are pooled from the mice received transplantation of microglia  
28 derived from both hESCs and hiPSCs. Data are presented as mean  $\pm$  s.e.m.

29 (M) Quantification of the percentage of hTMEM119<sup>+</sup> cells in total hN<sup>+</sup> cells ( $n = 7$  mice). Data are  
30 presented as mean  $\pm$  s.e.m.

31 (N) Quantification of Ki67<sup>+</sup> cells among the total donor-derived hN<sup>+</sup> cells at 3 weeks or 6 months post-  
32 transplantation ( $n = 8$  mice for each time point). The data are pooled from the mice received  
33 transplantation of microglia derived from both hESCs and hiPSCs. Student's *t* test. \*\* $P < 0.01$ . Data are  
34 presented as mean  $\pm$  s.e.m.

35  
36 **Figure 2. Human PSC-derived microglia undergo morphological maturation and are functional in**  
37 **the mouse brain.**

38 (A) Representative images of hTMEM119<sup>+</sup> hPSC-derived microglia and mTMEM119<sup>+</sup> mouse microglia  
39 in the cerebral cortex, corpus callosum (CC) and hippocampus (HIP) in 6 months old mice. Scale bars  
40 represent 200  $\mu\text{m}$  and 50  $\mu\text{m}$  in the original and enlarged images, respectively.

41 (B) Representative images of hTMEM119<sup>+</sup> hPSC-derived microglia and mTMEM119<sup>+</sup> mouse microglia  
42 in the cerebral cortex at 3 weeks, 8 weeks, and 6 months old mice. Scale bars represent 50  $\mu\text{m}$  and 20  
43  $\mu\text{m}$  in the original and enlarged images, respectively.

44 (C and D) Quantification of endpoint numbers, total process length of mouse and hPSC-derived  
45 microglia based on mTMEM119 or hTMEM119 staining respectively from grey matter at 3 weeks, 8  
46 weeks, and 6 months old mice ( $n = 7$  mice for each time point). The data are pooled from the mice  
47 received transplantation of microglia derived from both hESCs and hiPSCs. One-way ANOVA test, \* $P <$   
48 0.05, \*\*\* $P < 0.001$ , NS, no significance. Data are presented as mean  $\pm$  s.e.m.

49 (E) Quantification of the percentage of CD68<sup>+</sup> area in hTMEM119<sup>+</sup> area from cerebral cortex at 3  
50 weeks, 8 weeks and 6 months old chimeric mice ( $n = 7$  mice for each time point). One-way ANOVA  
51 test, \*\* $P < 0.01$ , \*\*\* $P < 0.001$ . Data are presented as mean  $\pm$  s.e.m.

1 (F) Quantification of PSD95<sup>+</sup> fraction engulfed per microglia from cerebral cortex at 3 weeks, 8 weeks  
2 and 6 months old chimeric mice (n = 7 mice for each time point). One-way ANOVA test, \*P < 0.05. Data  
3 are presented as mean ± s.e.m.  
4 (G) Representative images of CD68- and hTMEM119-expressing cells (the left three columns) in the  
5 cerebral cortex and 3D reconstruction images showing hCD45<sup>+</sup> donor-derived microglia with post-  
6 synaptic marker, PSD95 (the rightmost column) from 3 weeks, 8 weeks and 6 months old mice. Scale  
7 bars, 10 μm or 2 μm in the original or enlarged images, respectively.  
8 (H) Representative images showing the interactions between blood vessels and hPSC-derived  
9 microglia in grey matter and white matter at 8 weeks post-transplantation. Laminin labels blood vessels  
10 and hCD45 marks hPSC-derived microglia. Scale bars, 50 and 20 μm in the original or enlarged  
11 images, respectively.  
12

### 13 **Figure 3. Single-cell RNA-sequencing of hiPSC microglial chimeric mouse brain identifies gene 14 expression signatures of adult human microglia**

15 (A) A schematic diagram showing the experimental design. Microglia were isolated from the highlighted  
16 brain regions at 6 months post-transplantation and handled at 4°C to reduce ex vivo activation. The  
17 single-cell suspension was loaded into a 10X Genomics Chromium system for single-cell RNA-  
18 sequencing.

19 (B) tSNE plot of 11 cell types as identified by characteristic cell-specific gene expression, following  
20 translation of human gene symbols to mouse symbols as described in Methods. Arrow indicates the  
21 human xenograft microglia (Xeno MG).

22 (C) Dot plot showing two representative cell-specific genes for each cell cluster. As indicated by the  
23 legend, the diameter of the dot indicates the percent of cells within a cluster expressing the gene  
24 (pct.exp). The color saturation indicates the average expression over the cluster (avg.exp; log  
25 normalized counts). The cluster numbers, colors of clusters in panel B, and selected cell identities are  
26 shown at left.

27 (D) tSNE plots with dots (representing individual barcodes/cells) colored by expression of canonical  
28 microglial genes, based on expression level determined in Seurat (log normalized counts).

29 (E) A heatmap showing average expression of the top 30 human microglial signature genes<sup>8</sup> in each of  
30 the 11 cell clusters. Expression of each gene was expressed as a Z-score (normalized to average  
31 expression) to compare relative expression differences by cell type.

32 (F) Principal component analysis (PCA) of Xeno MGs (pink), and individual cell RNA-seq expression  
33 data from publicly-available datasets, including human adult microglia (Adult MG) from Ormel et al.,  
34 2018<sup>67</sup> (orange) and Galatro et al., 2017<sup>12</sup> (blue), human fetal microglia (Fetal MG; light green), iPSC-  
35 derived 2D microglia (iPS MG, green), blood macrophage (ochre), and liver macrophage (cyan) from  
36 Douvaras et al., 2017<sup>17</sup>, and hiPSC-derived 3D organoid microglia from Ormel et al., 2018<sup>67</sup> (oMG,  
37 violet), using the 547 genes identified as age-related genes in microglia by Galatro et. al., 2017<sup>12</sup>. PCA  
38 analysis demonstrates that Xeno MG have the most similarity to Adult MG, compared with other  
39 clusters, and is clearly separated from Blood/Liver macrophage.

40 (G) t-SNE plots of selected human cells showing the expression of *CD74*, *SPP1*, *C3*, *BAZ2B*, *CCL4*,  
41 *EGR2*, *EGR3*, and *CD83* gene transcripts. *CD74*, *SPP1*, *C3* and *BAZ2B* appear to be uniformly  
42 expressed in all cells, but *CCL4*, *EGR2*, *EGR3*, and *CD83* are enriched in distinct subsets of in Xeno  
43 MG.  
44

### 45 **Figure 4. Transcriptomic profiling analysis reveals differences between adult human and mouse 46 microglia**

47 (A) tSNE plot highlighting only the clusters of human Xeno MG and mouse host microglia.

48 (B) Scatter plot showing mRNA expression levels of human and mouse genes with unique orthologs  
49 from Xeno MG and mouse microglia clusters, highlighting the differentially expressed genes (DEGs; at  
50 least two-fold different) in human Xeno MG (red) or mouse microglia (green) from 6 month old chimeric



1 mouse brain. Significantly different DEGs (less than 5% false discovery rate [FDR] and at least two-fold  
2 different) are listed in Supplementary Table 2.  
3 (C) Violin plots summarizing expression differences in individual cells within the human Xeno MG and  
4 mouse microglia clusters. Dots indicate expression levels (as log normalized counts) of individual cells  
5 and the violin shape summarizes the distribution of expression in the population.  
6 (D) A heatmap showing the DEGs in individual samples (n = 4) of human and mouse microglia from 6  
7 month old chimeric mouse brains. Expression levels (log normalized counts) were normalized to mean  
8 expression of all samples, producing a Z-score, with color assignments indicated by the legend.  
9 (E) Enriched gene ontology (GO) biological process terms for the upregulated DEGs in human Xeno  
10 MG, plotted as the  $-\log_{10}$  (p-value) of enrichment<sup>94</sup>.  
11 (F and G) Bar plots showing the average expression (mean  $\pm$  SEM, n = 4 samples) of Alzheimer's  
12 disease (AD; F) or Parkinson's disease (PD; G)-associated genes in Xeno MG and mouse microglia.  
13 These genes were reported to be differentially expressed between human and mouse microglia as in  
14 Gosselin et al., 2017<sup>8</sup>.  
15 (H) Venn diagrams showing that majority of the genes that were reported to be differentially expressed  
16 between human and mouse microglia are recapitulated in our chimeric mouse model (10 out of 14 for  
17 AD; 18 out of 20 for PD).

1 **Supplementary figure Legends:**

2  
3 **Supplementary Figure 1. Identification of hPSC-derived microglia in the mouse brain.**

4 (A) Representative images showing the morphology of hTMEM119<sup>+</sup> hPSC-derived microglia in the  
5 cerebral cortex, hippocampus (HIP), olfactory bulb (OB), cerebellum (CB) and white matter (WM) at 6  
6 months post-transplantation. CC: corpus callosum. Scale bars: 50  $\mu$ m or 20  $\mu$ m in the original or  
7 enlarged images, respectively.

8 (B) Representative images of Ki67- and hN-expressing cells in the OB, lateral walls of lateral ventricle  
9 (LV), and WM at 6 months post-transplantation. Scale bars, 50  $\mu$ m or 20  $\mu$ m in the original or enlarged  
10 images, respectively.

11  
12 **Supplementary Figure 2. Characterization of the function of hPSC-derived microglia in the**  
13 **mouse brain.**

14 (A) Representative images of Iba1<sup>+</sup>/hN<sup>+</sup> hPSC-derived microglia in the grey matter (GM), white matter  
15 (WM) and olfactory bulb (OB) at 3 weeks and 8 weeks post-transplantation. CC: corpus callosum.  
16 Scale bars, 20  $\mu$ m in both the original and enlarged images.

17 (B) Representative 3D reconstruction images showing that hCD45<sup>+</sup> hPSC-derived microglia  
18 phagocytize Olig2<sup>+</sup> oligodendroglial cells in the CC at 3 weeks post-transplantation. Scale bars, 5  $\mu$ m.

19 (C) Representative images showing the interactions between laminin<sup>+</sup> blood vessels and hPSC-derived  
20 microglia in the OB at 8 weeks post-transplantation. Scale bars, 50  $\mu$ m.

21  
22 **Supplementary Figure 3. Single-cell RNA-sequencing of hiPSC microglial chimeric mouse**  
23 **brains.**

24 (A) A table summarizing the observed numbers of single-cell RNA-sequencing reads and those  
25 matching human (hg19) or mouse (mm10) genome with high confidence.

26 (B) tSNE plots showing that the 11 cell type clusters are reproducibly identified in each of the four  
27 sampled 6-month-old chimeric mouse brains.

28 (C) tSNE plot showing the expression of representative genes in each of the 11 clusters. Blue color  
29 saturation indicates relative log normalized counts in each cell (dot, as identified by unique barcode).

30 (D) A pie chart summarizing the numbers of cells (barcodes) identified within each clustered cell type.

31 (E) Scatter plot array showing the pairwise correlation of average expression for each cell type.

32 Notably, the Xeno MG and mouse microglia clusters had the highest correlation coefficient value,  
33 0.765.

34  
35 **Supplementary Figure 4. Transcriptomic profile of Xeno MG developed in the mouse brain.**

36 (A) Scatter plot showing correlation of human Xeno microglia with human adult microglia dataset  
37 reported in Galatro et. al., 2017. Expression levels are normalized reads per million (RPM). The 10X  
38 Genomics data from the Human Xeno MG matched only the relatively higher levels of expression ( $\log_2$   
39 RPM > 2) of the deeper (more RNAseq reads per sample) dataset from Galatro. However, transcripts  
40 above this threshold exhibited a strong correlation ( $r^2 = 0.3851$ ,  $p < 2.2 \times 10^{-16}$ ).

41 (B) t-SNE plots for mRNA expression of acute pro-inflammatory cytokines, *IL-1 $\beta$* , *IL-1 $\alpha$* , and *TNF- $\alpha$* , and  
42 chronic pro-inflammatory cytokine, *IL-6* and anti-inflammatory cytokine, *IL-10*.

43 (C) t-SNE plots for *CST3*, *P2RY13*, *EGR1*, and *MCL1* mRNA expression (log normalized counts) within  
44 the selected human Xeno MG cluster.

45 (D) Bar plots showing the expression (mean  $\pm$  SEM, n = 4) of multiple sclerosis (MS) or schizophrenia  
46 (SCZ)-associated genes in Xeno MG and mouse microglia. All these genes were reported to be  
47 differentially expressed between human and mouse microglia in Gosselin et al., 2017<sup>8</sup>.

48 (E) Venn diagram showing that the majority of genes that were reported to be differentially expressed  
49 between human and mouse microglia are recapitulated in our chimeric mouse model (29 of 32 for MS;  
50 34 of 42 for SCZ).

1 **References:**

- 2 1. Li, Q. & Barres, B.A. Microglia and macrophages in brain homeostasis and disease. *Nat Rev*  
3 *Immunol* **18**, 225-242 (2018).
- 4 2. Casano, A.M. & Peri, F. Microglia: multitasking specialists of the brain. *Dev Cell* **32**, 469-477  
5 (2015).
- 6 3. Keren-Shaul, H. et al. A Unique Microglia Type Associated with Restricting Development of  
7 Alzheimer's Disease. *Cell* **169**, 1276-1290 e1217 (2017).
- 8 4. Hong, S. et al. Complement and microglia mediate early synapse loss in Alzheimer mouse  
9 models. *Science* **352**, 712-716 (2016).
- 10 5. Yeh, F.L., Wang, Y., Tom, I., Gonzalez, L.C. & Sheng, M. TREM2 Binds to Apolipoproteins,  
11 Including APOE and CLU/APOJ, and Thereby Facilitates Uptake of Amyloid-Beta by  
12 Microglia. *Neuron* **91**, 328-340 (2016).
- 13 6. Venegas, C. et al. Microglia-derived ASC specks cross-seed amyloid-beta in Alzheimer's  
14 disease. *Nature* **552**, 355-361 (2017).
- 15 7. Fuhrmann, M. et al. Microglial Cx3cr1 knockout prevents neuron loss in a mouse model of  
16 Alzheimer's disease. *Nat Neurosci* **13**, 411-413 (2010).
- 17 8. Gosselin, D. et al. An environment-dependent transcriptional network specifies human  
18 microglia identity. *Science* **356** (2017).
- 19 9. Hansen, D.V., Hanson, J.E. & Sheng, M. Microglia in Alzheimer's disease. *The Journal of cell*  
20 *biology* **217**, 459-472 (2018).
- 21 10. Holtman, I.R., Skola, D. & Glass, C.K. Transcriptional control of microglia phenotypes in  
22 health and disease. *J Clin Invest* **127**, 3220-3229 (2017).
- 23 11. Smith, A.M. & Draganow, M. The human side of microglia. *Trends Neurosci* **37**, 125-135  
24 (2014).
- 25 12. Galatro, T.F. et al. Transcriptomic analysis of purified human cortical microglia reveals age-  
26 associated changes. *Nat Neurosci* **20**, 1162-1171 (2017).
- 27 13. Friedman, B.A. et al. Diverse Brain Myeloid Expression Profiles Reveal Distinct Microglial  
28 Activation States and Aspects of Alzheimer's Disease Not Evident in Mouse Models. *Cell Rep*  
29 **22**, 832-847 (2018).
- 30 14. Muffat, J. et al. Efficient derivation of microglia-like cells from human pluripotent stem cells.  
31 *Nat Med* **22**, 1358-1367 (2016).
- 32 15. Pandya, H. et al. Differentiation of human and murine induced pluripotent stem cells to  
33 microglia-like cells. *Nat Neurosci* **20**, 753-759 (2017).
- 34 16. Abud, E.M. et al. iPSC-Derived Human Microglia-like Cells to Study Neurological Diseases.  
35 *Neuron* **94**, 278-293 e279 (2017).
- 36 17. Douvaras, P. et al. Directed Differentiation of Human Pluripotent Stem Cells to Microglia.  
37 *Stem Cell Reports* **8**, 1516-1524 (2017).
- 38 18. Haenseler, W. et al. A Highly Efficient Human Pluripotent Stem Cell Microglia Model  
39 Displays a Neuronal-Co-culture-Specific Expression Profile and Inflammatory Response.  
40 *Stem Cell Reports* **8**, 1727-1742 (2017).
- 41 19. Brownjohn, P.W. et al. Functional Studies of Missense TREM2 Mutations in Human Stem  
42 Cell-Derived Microglia. *Stem Cell Reports* **10**, 1294-1307 (2018).
- 43 20. Olah, M. et al. A transcriptomic atlas of aged human microglia. *Nature communications* **9**,  
44 539 (2018).

- 1 21. Chen, C., Kim, W.Y. & Jiang, P. Humanized neuronal chimeric mouse brain generated by  
2 neonatally engrafted human iPSC-derived primitive neural progenitor cells. *JCI Insight* **1**,  
3 e88632 (2016).
- 4 22. Xu, R. et al. Reversing Abnormal Neural Development by Inhibiting OLIG2 in Down  
5 Syndrome Human iPSC Brain Organoids and Neuronal Mouse Chimeras. *BioRxiv* (2018).
- 6 23. Windrem, M.S. et al. Human iPSC Glial Mouse Chimeras Reveal Glial Contributions to  
7 Schizophrenia. *Cell Stem Cell* **21**, 195-208 e196 (2017).
- 8 24. Han, X. et al. Forebrain engraftment by human glial progenitor cells enhances synaptic  
9 plasticity and learning in adult mice. *Cell Stem Cell* **12**, 342-353 (2013).
- 10 25. Chen, H. et al. Human-derived neural progenitors functionally replace astrocytes in adult  
11 mice. *J Clin Invest* **125**, 1033-1042 (2015).
- 12 26. Claes, C., Van den Daele, J. & Verfaillie, C.M. Generating tissue-resident macrophages from  
13 pluripotent stem cells: Lessons learned from microglia. *Cell Immunol* **330**, 60-67 (2018).
- 14 27. Sturgeon, C.M., Ditadi, A., Awong, G., Kennedy, M. & Keller, G. Wnt signaling controls the  
15 specification of definitive and primitive hematopoiesis from human pluripotent stem cells.  
16 *Nat Biotechnol* **32**, 554-561 (2014).
- 17 28. Bennett, M.L. et al. New tools for studying microglia in the mouse and human CNS. *Proc Natl*  
18 *Acad Sci U S A* **113**, E1738-1746 (2016).
- 19 29. Kettenmann, H., Hanisch, U.K., Noda, M. & Verkhratsky, A. Physiology of microglia. *Physiol*  
20 *Rev* **91**, 461-553 (2011).
- 21 30. Forrester, J.V., McMenamin, P.G. & Dando, S.J. CNS infection and immune privilege. *Nat Rev*  
22 *Neurosci* **19**, 655-671 (2018).
- 23 31. McKercher, S.R. et al. Targeted disruption of the PU.1 gene results in multiple  
24 hematopoietic abnormalities. *EMBO J* **15**, 5647-5658 (1996).
- 25 32. Kim, E.M., Manzar, G. & Zavazava, N. Human iPS cell-derived hematopoietic progenitor cells  
26 induce T-cell anergy in in vitro-generated alloreactive CD8(+) T cells. *Blood* **121**, 5167-  
27 5175 (2013).
- 28 33. Smith, A.M. et al. The transcription factor PU.1 is critical for viability and function of human  
29 brain microglia. *Glia* **61**, 929-942 (2013).
- 30 34. Feng, R. et al. PU.1 and C/EBPalpha/beta convert fibroblasts into macrophage-like cells.  
31 *Proc Natl Acad Sci U S A* **105**, 6057-6062 (2008).
- 32 35. Ford, A.L., Goodsall, A.L., Hickey, W.F. & Sedgwick, J.D. Normal adult ramified microglia  
33 separated from other central nervous system macrophages by flow cytometric sorting.  
34 Phenotypic differences defined and direct ex vivo antigen presentation to myelin basic  
35 protein-reactive CD4+ T cells compared. *J Immunol* **154**, 4309-4321 (1995).
- 36 36. Pirzgalska, R.M. et al. Sympathetic neuron-associated macrophages contribute to obesity by  
37 importing and metabolizing norepinephrine. *Nat Med* **23**, 1309-1318 (2017).
- 38 37. Lawson, L.J., Perry, V.H., Dri, P. & Gordon, S. Heterogeneity in the distribution and  
39 morphology of microglia in the normal adult mouse brain. *Neuroscience* **39**, 151-170  
40 (1990).
- 41 38. Marsh, S.E. et al. The adaptive immune system restrains Alzheimer's disease pathogenesis  
42 by modulating microglial function. *Proc Natl Acad Sci U S A* **113**, E1316-1325 (2016).
- 43 39. Hanisch, U.K. & Kettenmann, H. Microglia: active sensor and versatile effector cells in the  
44 normal and pathologic brain. *Nat Neurosci* **10**, 1387-1394 (2007).
- 45 40. Colonna, M. & Butovsky, O. Microglia Function in the Central Nervous System During Health  
46 and Neurodegeneration. *Annu Rev Immunol* **35**, 441-468 (2017).

- 1 41. Weinhard, L. et al. Microglia remodel synapses by presynaptic trogocytosis and spine head  
2 filopodia induction. *Nat Commun* **9**, 1228 (2018).
- 3 42. Paolicelli, R.C. et al. Synaptic pruning by microglia is necessary for normal brain  
4 development. *Science* **333**, 1456-1458 (2011).
- 5 43. Schafer, D.P. & Stevens, B. Microglia Function in Central Nervous System Development and  
6 Plasticity. *Cold Spring Harb Perspect Biol* **7**, a020545 (2015).
- 7 44. Li, Q.Y. et al. Developmental Heterogeneity of Microglia and Brain Myeloid Cells Revealed  
8 by Deep Single-Cell RNA Sequencing. *Neuron* **101**, 207-+ (2019).
- 9 45. Eriksson-Dotter-Nilsson, M., Bjorklund, H. & Olson, L. Laminin immunohistochemistry: a simple  
10 method to visualize and quantitate vascular structures in the mammalian brain. *J Neurosci*  
11 *Methods* **17**, 275-286 (1986).
- 12 46. Zhang, Y. et al. Purification and Characterization of Progenitor and Mature Human  
13 Astrocytes Reveals Transcriptional and Functional Differences with Mouse. *Neuron* **89**, 37-  
14 53 (2016).
- 15 47. Dulken, B.W., Leeman, D.S., Boutet, S.C., Hebestreit, K. & Brunet, A. Single-Cell  
16 Transcriptomic Analysis Defines Heterogeneity and Transcriptional Dynamics in the Adult  
17 Neural Stem Cell Lineage. *Cell Rep* **18**, 777-790 (2017).
- 18 48. Tkachev, D. et al. Oligodendrocyte dysfunction in schizophrenia and bipolar disorder.  
19 *Lancet* **362**, 798-805 (2003).
- 20 49. Lee, J., Gravel, M., Zhang, R., Thibault, P. & Braun, P.E. Process outgrowth in  
21 oligodendrocytes is mediated by CNP, a novel microtubule assembly myelin protein. *The*  
22 *Journal of cell biology* **170**, 661-673 (2005).
- 23 50. Wang, S. et al. Human iPSC-derived oligodendrocyte progenitor cells can myelinate and  
24 rescue a mouse model of congenital hypomyelination. *Cell Stem Cell* **12**, 252-264 (2013).
- 25 51. Liu, M.L. et al. Small molecules enable neurogenin 2 to efficiently convert human fibroblasts  
26 into cholinergic neurons. *Nat Commun* **4**, 2183 (2013).
- 27 52. Sherriff, F.E., Bridges, L.R., Gentleman, S.M., Sivaloganathan, S. & Wilson, S. Markers of  
28 axonal injury in post mortem human brain. *Acta neuropathologica* **88**, 433-439 (1994).
- 29 53. Bergsland, M., Werme, M., Malewicz, M., Perlmann, T. & Muhr, J. The establishment of  
30 neuronal properties is controlled by Sox4 and Sox11. *Genes Dev* **20**, 3475-3486 (2006).
- 31 54. Fuzik, J. et al. Integration of electrophysiological recordings with single-cell RNA-seq data  
32 identifies neuronal subtypes. *Nat Biotechnol* **34**, 175-183 (2016).
- 33 55. Sweeney, M.D., Kisler, K., Montagne, A., Toga, A.W. & Zlokovic, B.V. The role of brain  
34 vasculature in neurodegenerative disorders. *Nat Neurosci* **21**, 1318-1331 (2018).
- 35 56. Bostrom, K.I. Cell differentiation in vascular calcification. *Z Kardiol* **89 Suppl 2**, 69-74  
36 (2000).
- 37 57. Marques, F. et al. Lipocalin 2 is a choroid plexus acute-phase protein. *J Cereb Blood Flow*  
38 *Metab* **28**, 450-455 (2008).
- 39 58. Marques, F. et al. Transcriptome signature of the adult mouse choroid plexus. *Fluids*  
40 *Barriers CNS* **8**, 10 (2011).
- 41 59. Arneson, D. et al. Single cell molecular alterations reveal target cells and pathways of  
42 concussive brain injury. *Nat Commun* **9**, 3894 (2018).
- 43 60. Daneman, R. et al. The mouse blood-brain barrier transcriptome: a new resource for  
44 understanding the development and function of brain endothelial cells. *PLoS One* **5**, e13741  
45 (2010).

- 1 61. Tremblay, R., Lee, S. & Rudy, B. GABAergic Interneurons in the Neocortex: From Cellular  
2 Properties to Circuits. *Neuron* **91**, 260-292 (2016).
- 3 62. Hu, J.S. et al. Coup-TF1 and Coup-TF2 control subtype and laminar identity of MGE-derived  
4 neocortical interneurons. *Development* **144**, 2837-2851 (2017).
- 5 63. Pan, J.Z. et al. Cytokine activity contributes to induction of inflammatory cytokine mRNAs in  
6 spinal cord following contusion. *J Neurosci Res* **68**, 315 (2002).
- 7 64. Feghali, C.A. & Wright, T.M. Cytokines in acute and chronic inflammation. *Front Biosci* **2**,  
8 d12-26 (1997).
- 9 65. Turner, M.D., Nedjai, B., Hurst, T. & Pennington, D.J. Cytokines and chemokines: At the  
10 crossroads of cell signalling and inflammatory disease. *Biochim Biophys Acta* **1843**, 2563-  
11 2582 (2014).
- 12 66. Yamamizu, K. et al. In Vitro Modeling of Blood-Brain Barrier with Human iPSC-Derived  
13 Endothelial Cells, Pericytes, Neurons, and Astrocytes via Notch Signaling. *Stem Cell Reports*  
14 **8**, 634-647 (2017).
- 15 67. Ormel, P.R. et al. Microglia innately develop within cerebral organoids. *Nature*  
16 *communications* **9**, 4167 (2018).
- 17 68. Masuda, T. et al. Spatial and temporal heterogeneity of mouse and human microglia at  
18 single-cell resolution. *Nature* **566**, 388-392 (2019).
- 19 69. Wolf, S.A., Boddeke, H.W. & Kettenmann, H. Microglia in Physiology and Disease. *Annu Rev*  
20 *Physiol* **79**, 619-643 (2017).
- 21 70. Butovsky, O. & Weiner, H.L. Microglial signatures and their role in health and disease. *Nat*  
22 *Rev Neurosci* **19**, 622-635 (2018).
- 23 71. Ito, R., Takahashi, T. & Ito, M. Humanized mouse models: Application to human diseases. *J*  
24 *Cell Physiol* **233**, 3723-3728 (2018).
- 25 72. Askew, K. et al. Coupled Proliferation and Apoptosis Maintain the Rapid Turnover of  
26 Microglia in the Adult Brain. *Cell Rep* **18**, 391-405 (2017).
- 27 73. Tay, T.L. et al. A new fate mapping system reveals context-dependent random or clonal  
28 expansion of microglia. *Nat Neurosci* **20**, 793-803 (2017).
- 29 74. Reu, P. et al. The Lifespan and Turnover of Microglia in the Human Brain. *Cell Rep* **20**, 779-  
30 784 (2017).
- 31 75. Windrem, M.S. et al. A competitive advantage by neonatally engrafted human glial  
32 progenitors yields mice whose brains are chimeric for human glia. *J Neurosci* **34**, 16153-  
33 16161 (2014).
- 34 76. McQuade, A. et al. Development and validation of a simplified method to generate human  
35 microglia from pluripotent stem cells. *Mol Neurodegener* **13**, 67 (2018).
- 36 77. Stevens, B. et al. The classical complement cascade mediates CNS synapse elimination. *Cell*  
37 **131**, 1164-1178 (2007).
- 38 78. Cunningham, C.L., Martinez-Cerdeno, V. & Noctor, S.C. Microglia regulate the number of  
39 neural precursor cells in the developing cerebral cortex. *J Neurosci* **33**, 4216-4233 (2013).
- 40 79. Thion, M.S., Ginhoux, F. & Garel, S. Microglia and early brain development: An intimate  
41 journey. *Science* **362**, 185-189 (2018).
- 42 80. Elmore, M.R. et al. Colony-stimulating factor 1 receptor signaling is necessary for microglia  
43 viability, unmasking a microglia progenitor cell in the adult brain. *Neuron* **82**, 380-397  
44 (2014).
- 45 81. Gowing, G., Vallieres, L. & Julien, J.P. Mouse model for ablation of proliferating microglia in  
46 acute CNS injuries. *Glia* **53**, 331-337 (2006).

- 1 82. Lan, P., Tonomura, N., Shimizu, A., Wang, S. & Yang, Y.G. Reconstitution of a functional  
2 human immune system in immunodeficient mice through combined human fetal  
3 thymus/liver and CD34+ cell transplantation. *Blood* **108**, 487-492 (2006).
- 4 83. Slukvin, II Hematopoietic specification from human pluripotent stem cells: current  
5 advances and challenges toward de novo generation of hematopoietic stem cells. *Blood*  
6 **122**, 4035-4046 (2013).
- 7 84. Chen, C. et al. Role of astroglia in Down's syndrome revealed by patient-derived human-  
8 induced pluripotent stem cells. *Nature communications* **5**, 4430 (2014).
- 9 85. Muller, F.J. et al. A bioinformatic assay for pluripotency in human cells. *Nat Methods* **8**, 315-  
10 317 (2011).
- 11 86. Marques, S. et al. Oligodendrocyte heterogeneity in the mouse juvenile and adult central  
12 nervous system. *Science* **352**, 1326-1329 (2016).
- 13 87. Butler, A. & Satija, R. Integrated analysis of single cell transcriptomic data across  
14 conditions, technologies, and species. *bioRxiv*, 164889 (2017).
- 15 88. Macosko, E.Z. et al. Highly Parallel Genome-wide Expression Profiling of Individual Cells  
16 Using Nanoliter Droplets. *Cell* **161**, 1202-1214 (2015).
- 17 89. Satija, R., Farrell, J.A., Gennert, D., Schier, A.F. & Regev, A. Spatial reconstruction of single-  
18 cell gene expression data. *Nat Biotechnol* **33**, 495-502 (2015).
- 19 90. Gentleman, R.C. et al. Bioconductor: open software development for computational biology  
20 and bioinformatics. *Genome Biol* **5**, R80 (2004).
- 21 91. Butler, A., Hoffman, P., Smibert, P., Papalexi, E. & Satija, R. Integrating single-cell  
22 transcriptomic data across different conditions, technologies, and species. *Nat Biotechnol*  
23 **36**, 411-420 (2018).
- 24 92. Kim, D., Langmead, B. & Salzberg, S.L. HISAT: a fast spliced aligner with low memory  
25 requirements. *Nature methods* **12**, 357-360 (2015).
- 26 93. Love, M.I., Huber, W. & Anders, S. Moderated estimation of fold change and dispersion for  
27 RNA-seq data with DESeq2. *Genome Biol* **15**, 550 (2014).
- 28 94. Reimand, J. et al. g:Profiler-a web server for functional interpretation of gene lists (2016  
29 update). *Nucleic Acids Res* **44**, W83-89 (2016).
- 30 95. Pasca, A.M. et al. Functional cortical neurons and astrocytes from human pluripotent stem  
31 cells in 3D culture. *Nature methods* **12**, 671-678 (2015).
- 32 96. Liu, Y., Jiang, P. & Deng, W. OLIG gene targeting in human pluripotent stem cells for motor  
33 neuron and oligodendrocyte differentiation. *Nat Protoc* **6**, 640-655 (2011).
- 34  
35  
36

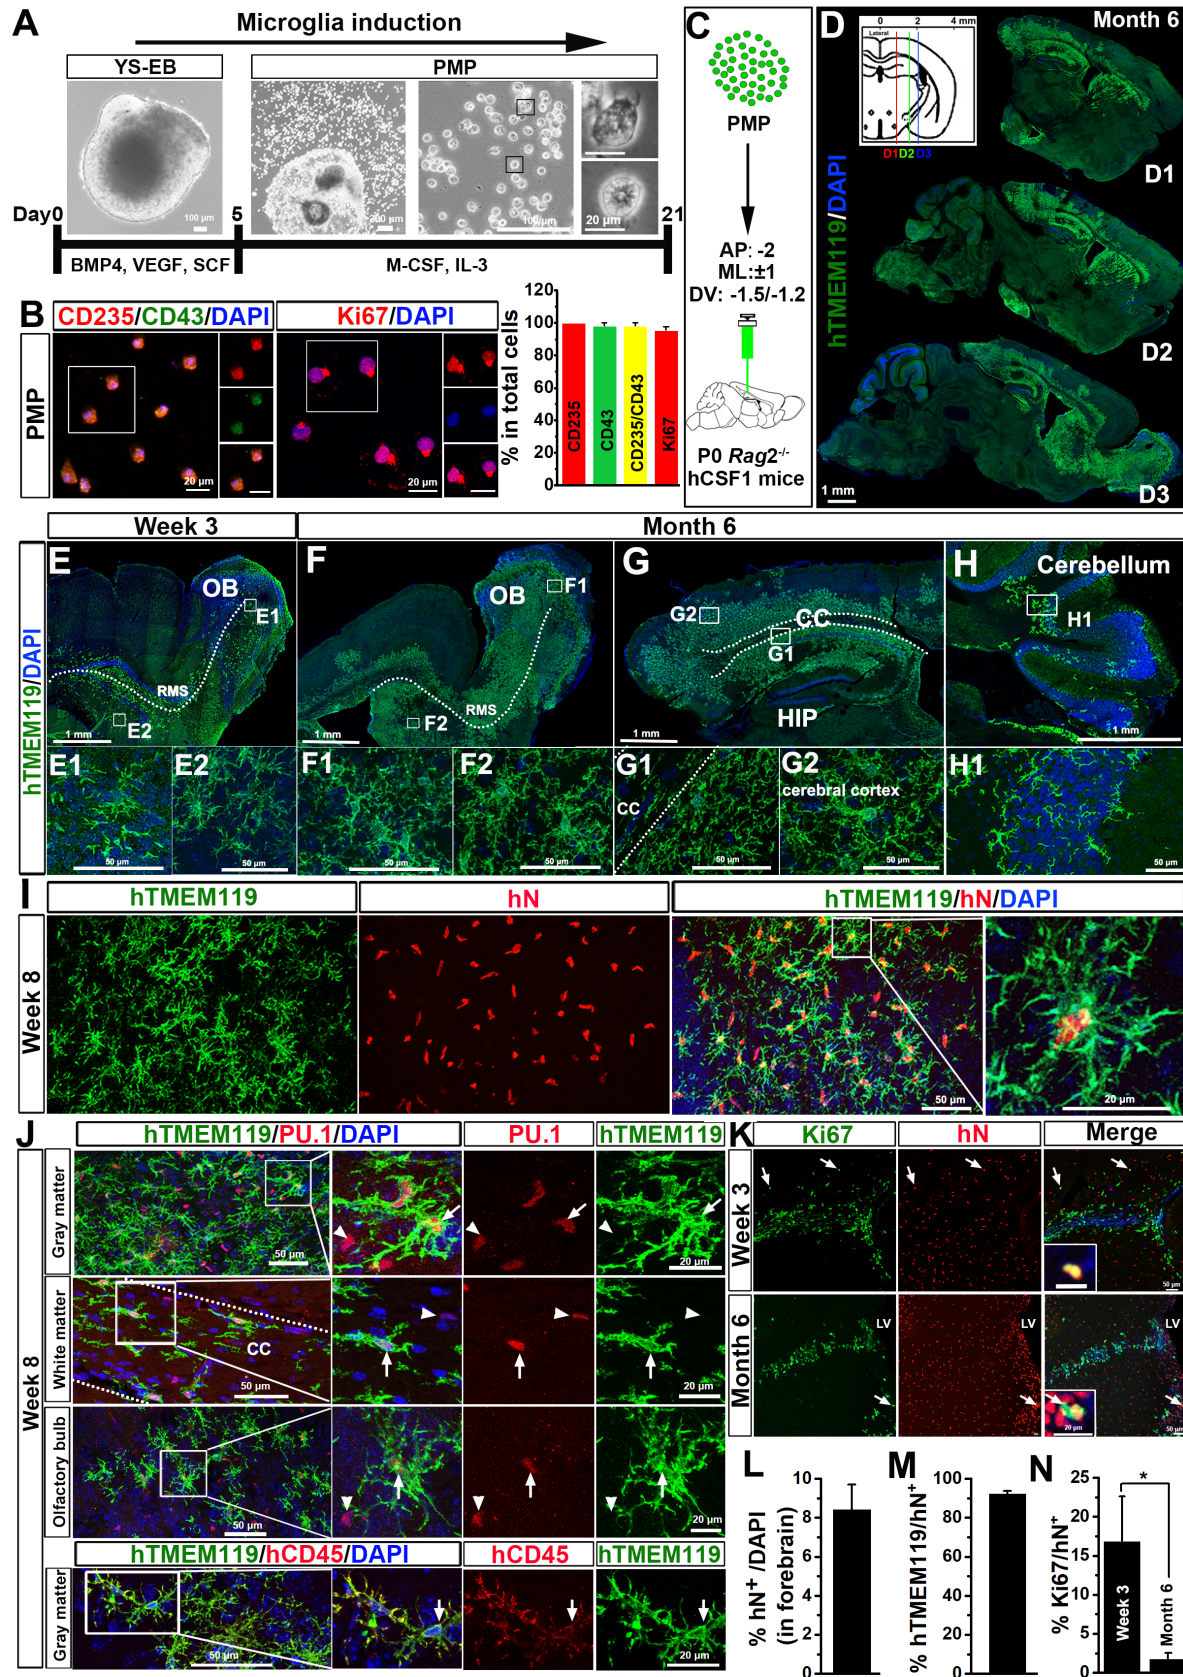



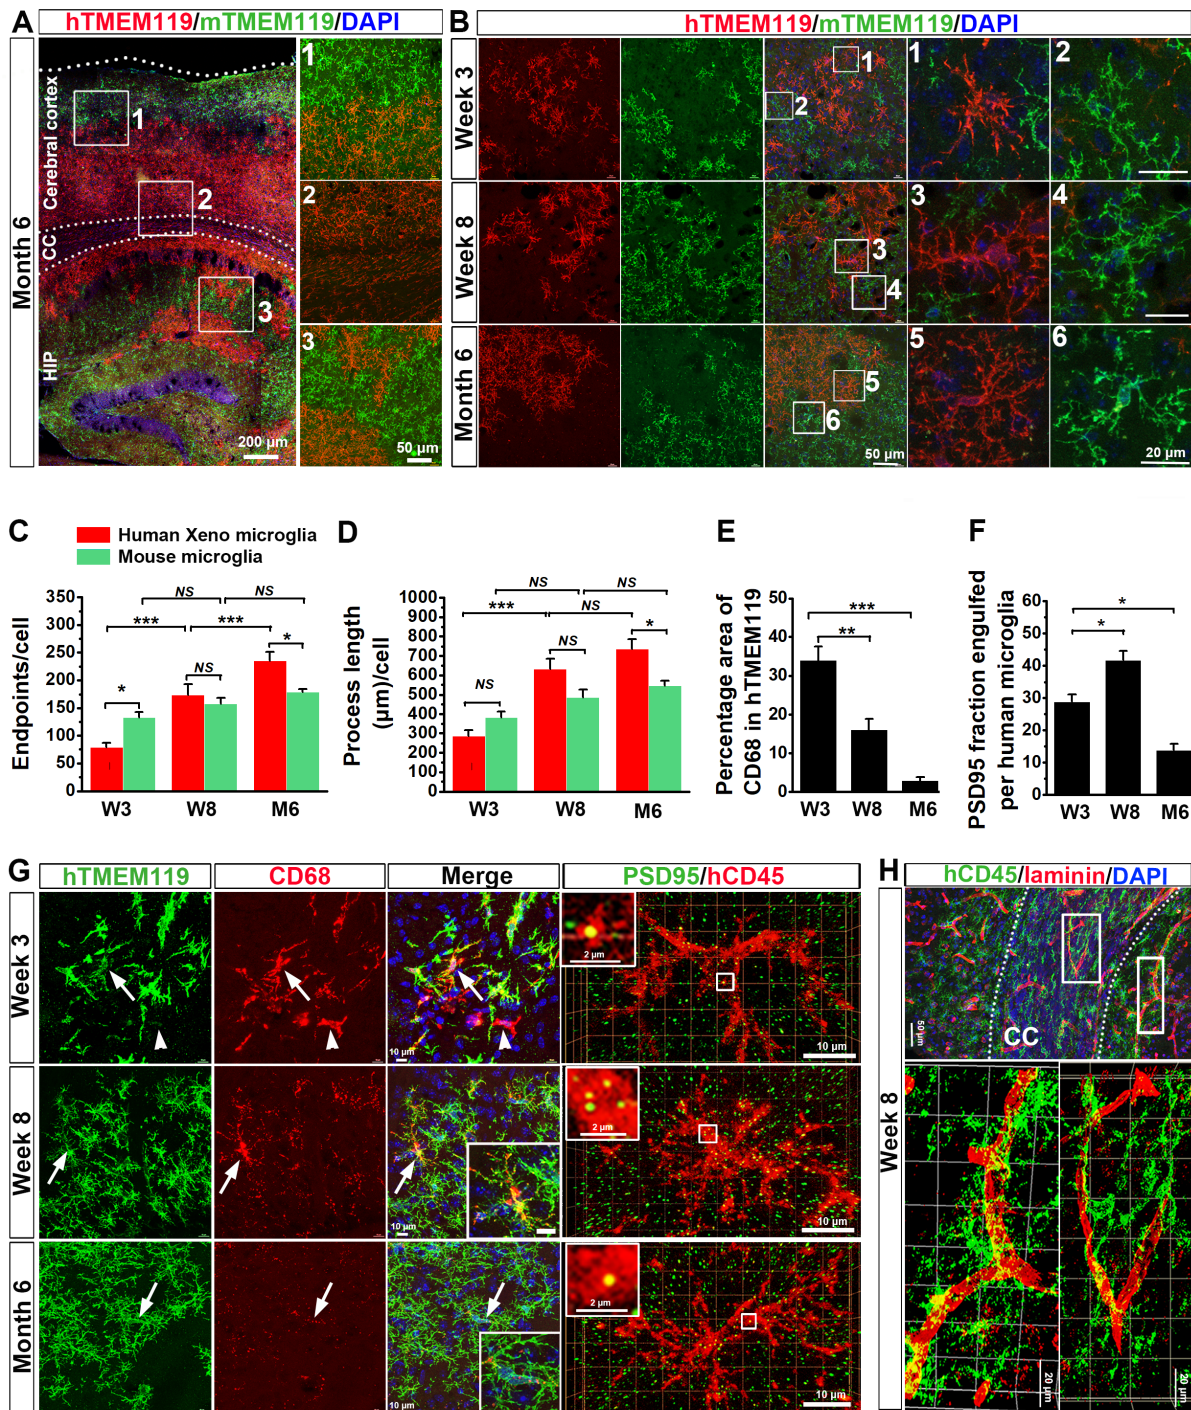

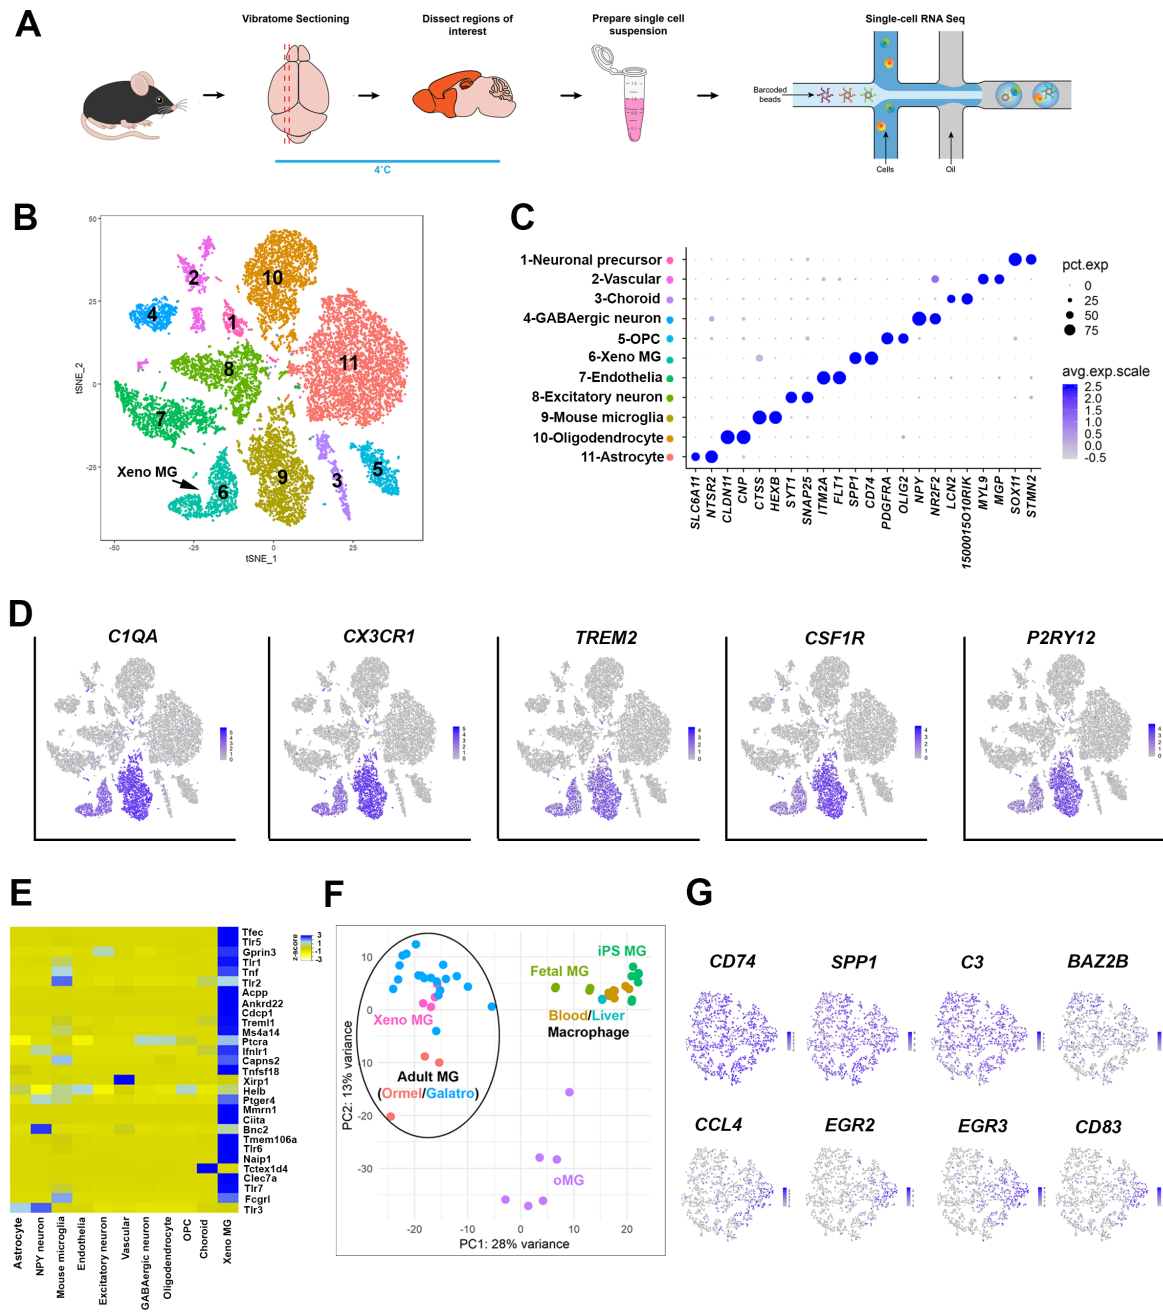

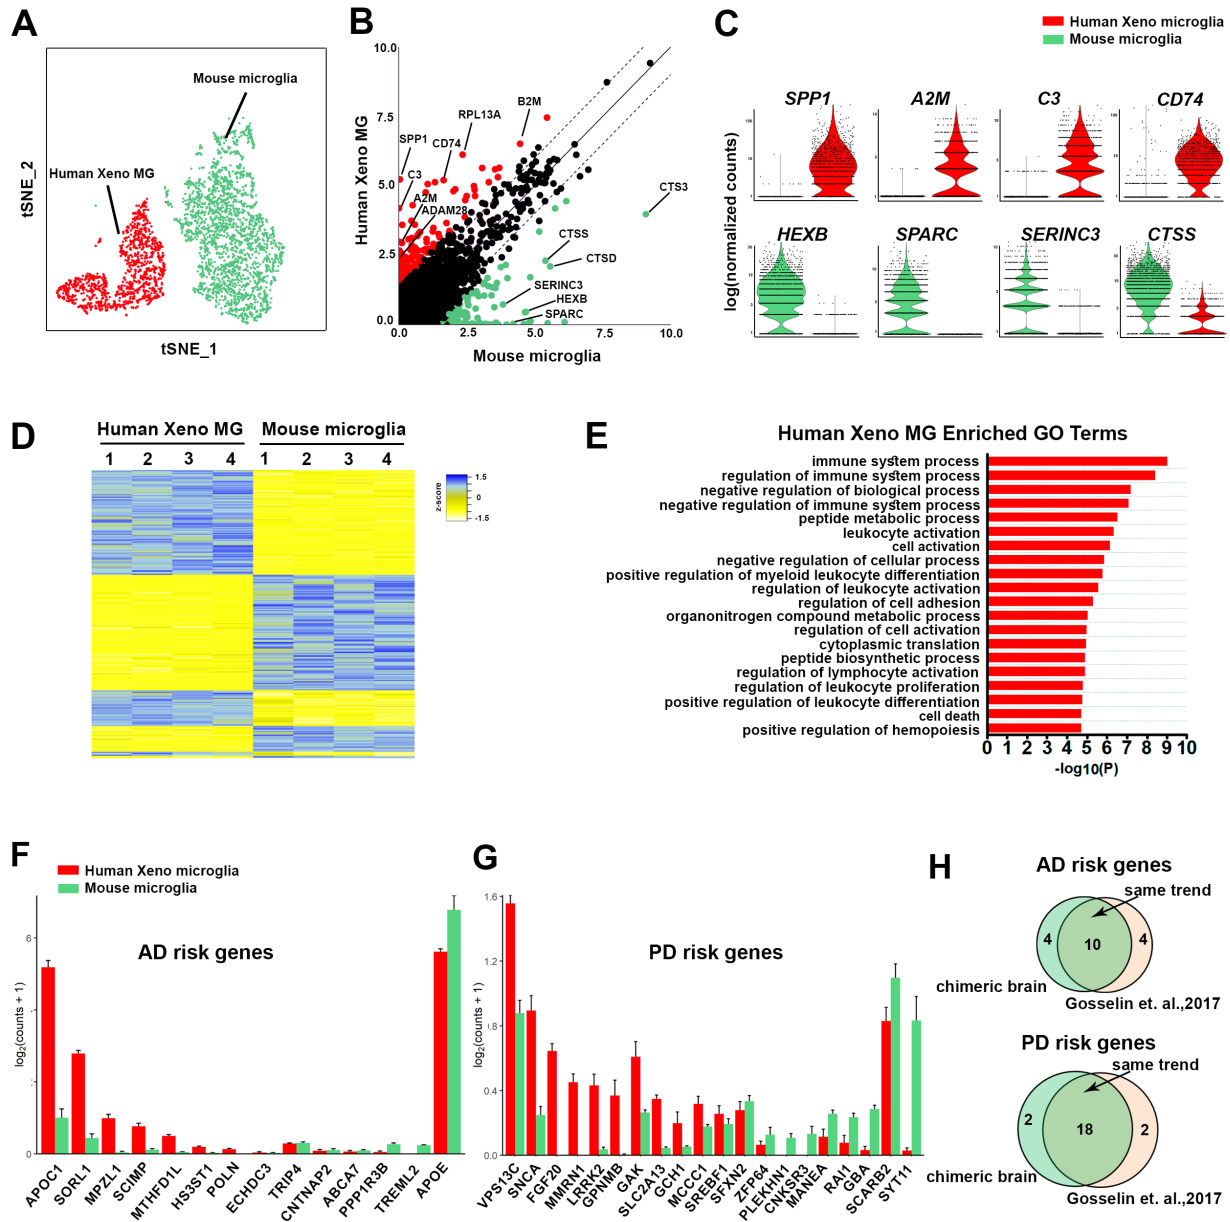

Source: http://biorxiv.org/content/10.1101/594721v1.full.pdf
